# Supplementary material
Source: PubMed Central journal article supplement (PMC7302515)
Supplement: ioz053_supplemental_file.pdf [file ioz053_supplemental_file.pdf]

Supplementary Table 1

List of all antibodies used in the study

| Antibody     | Manufacturer              | Catalog number | Lot number  | 652 |
|--------------|---------------------------|----------------|-------------|-----|
| GATA4        | Santa Cruz biotechnology  | Sc-25310       | E2215       |     |
| $\alpha$ SMA | Abcam                     | ab7817         | GR309548-3  |     |
| UCHL1        | Abcam                     | ab8189         | GR3198915-4 |     |
| Cyp450       | BioRad                    | MCA2077S       | 170815      |     |
| CD31         | Abcam                     | ab28364        | GR291622-7  |     |
| Collagen IV  | Abcam                     | ab6586         | GR3215728-3 |     |
| Laminin      | Abcam                     | ab11575        | GR233309-1  |     |
| Fibronectin  | Abcam                     | ab23751        | GR273278-1  |     |
| Claudin11    | Thermo Fisher             | 36-4500        | RB215337    |     |
| Occludin     | Abcam                     | ab31721        | GR3177470-2 |     |
| Stra8        | Abcam                     | ab49602        | GR3210261-1 |     |
| LC3B         | Cell Signaling Technology | 2775S          | 10          |     |
